# Supplementary material for: m6A RNA methylation of major satellite repeat transcripts facilitates chromatin association and RNA:DNA hybrid formation in mouse heterochromatin
Source: PubMed Central journal article supplement (PMC8191757; doi:10.1093/nar/gkab364), 2021-05-17
Supplement: gkab364_supplemental_file.pdf [file gkab364_supplemental_file.pdf]

## **SUPPLEMENTARY DATA**

### **SUPPLEMENTARY MATERIALS AND METHODS**

#### **MiSeq RNA sequencing of captured hetRNA**

6 ng of MSR-captured RNA and 3 ng of LINE L1MdA 5'UTR-captured RNA were fragmented and then used to generate cDNA libraries (ribosomal RNA-depleted) for MiSeq analysis with the NEBNext Ultra Directional RNA Library Prep Kit for Illumina (NEB). Because of their different size distribution, the MSR-captured RNA was divided into two tubes, sheared in NEBNext First Strand Synthesis Reaction buffer (NEB) for 7.5 min and 8.5 min and then combined again. The LINE L1MdA 5'UTR-captured RNA was fragmented for 8.5 min. The cDNA libraries were sequenced on a MiSeq (Illumina) platform using a 75 bp paired end multiplex run with a coverage of around 3.5 million reads per cDNA library.

#### **Indirect immunofluorescence for HP1 $\alpha$ and H3K9me3**

$5 \times 10^4$  ES cells were spun on a microscope slide using a Cytospin 4 (Thermo Fisher Scientific). Cells were fixed with 2% paraformaldehyde (PFA) for 10 min at RT, washed three times with PBS and then stored at 4°C. Cells were permeabilized with 0.5% Triton X-100 (in PBS) for 5 min at RT and washed three times with PBS. The HP1 $\alpha$  antibody (mouse monoclonal, Merck Millipore, clone 15.19s2) was diluted 1:200 in 5% goat serum and the H3K9me3 antibody (rabbit polyclonal, Abcam, cat. no. ab8898) was diluted 1:500 in 5% goat serum. The primary antibodies were incubated with the permeabilized cells for 1 h at RT or O/N at 4°C. After three washes with PBS, Cy3-coupled goat anti-mouse polyclonal antibody and Cy5-coupled goat anti-rabbit polyclonal antibody (both Thermo Fisher Scientific) were added in a 1:250 dilution in 5% goat serum and incubated for 1 h at RT in a dark chamber. The secondary antibodies were washed three times with PBS. Cells were post-fixed with 2% paraformaldehyde (PFA) for 10 min in RT and mounted with Vectashield medium containing DAPI (Vector Laboratories). The coverslips were sealed with nail polish and stored at 4°C. Immunofluorescence was analyzed with the Observer Z.1 fluorescence microscope (Zeiss) using a 63x magnification and the AxioCam MRm camera (Zeiss). Images were acquired and analyzed with Axio Imager software version 2 (Zeiss).

#### **Chromatin immunoprecipitation (ChIP)**

ChIP was performed as described (1) with the following adjustments. 1-2 maxi dishes with  $1 \times 10^7$  ES cells were agitated in cell culture crosslinking solution containing a final concentration of 1% formaldehyde (Sigma-Aldrich) for 10 min at RT. Crosslinking was quenched with 0.125 M glycine for 5 min and the cells were washed 3 times with ice-cold PBS, and then lysed with 1 ml of ChIP-lysis buffer (1% SDS, 10 mM EDTA, 50 mM Tris-HCl pH 8.0, and protease inhibitors (Roche)). Cell lysates were transferred to miliTUBEs (Covaris) and sonicated using a Covaris S220 with the following settings: 105 Peak Power, 5.0 Duty Factor, 200 cycles per burst, and 240 s sonication time. DNA from an aliquot of the sample was run on a 1% agarose gel to control for the generation of sonicated DNA fragments

ranging between 200-1000 bp. The sonicated chromatin was then stored at 4°C. Sonicated chromatin corresponding to 3 µg of DNA was incubated in 1 ml of dilution buffer (1% Triton X-100, 2mM EDTA pH 8.0, 150 mM NaCl, 20 mM Tris-HCl pH 8.0, and protease inhibitors (Roche)) with 25 µl of magnetic Protein G Dynabeads (Thermo Fisher Scientific) that had been coupled to 3 µg of α-H3K9me3 antibody (Abcam, cat. no. ab8898) O/N at 4°C. The next day, the bead-antibody-chromatin complexes were washed three times for 5 min at RT with 1 ml of ChIP-wash buffer (0.1% SDS, 1% Triton X-100, 2mM EDTA pH 8.0, 150 mM NaCl, 20 mM Tris-HCl pH 8.0, and protease inhibitors (Roche)) and once for 10 min with 1 ml of ChIP-final wash buffer (0.1% SDS, 1% Triton X-100, 2mM EDTA pH 8.0, 500 mM NaCl, 20 mM Tris-HCl pH 8.0, and protease inhibitors (Roche)). Beads were resuspended in 100 µl of ChIP-elution buffer (1% SDS and 0.1M NaHCO<sub>3</sub>) containing 0.5 µg/µl RNase A and 0.5 µg/µl Proteinase K (both Thermo Fisher Scientific) and incubated for 1 h at 37°C, followed by a 5 h or O/N incubation at 65°C to reverse the crosslinking. DNA was then purified with a NucleoSpin Gel and PCR Clean Up DNA purification kit (Macherey-Nagel) and eluted in 30 µl water. 2 µl were processed for qPCR with the QuantStudio 6 Flex machine (Applied Biosystems) with an annealing temperature of 60°C in a program using 40 cycles.

### **Expression analysis of protein-coding genes in nuclear RNA**

Nuclear RNA of WT26, *Mettl14* KO, RBC and *Mettl3* KO ES cells was isolated and processed for HiSeq RNA sequencing as described in Materials and methods. The quality of raw and trimmed Fastq reads was verified using FastQC (2). Reads were trimmed using cutadapt version 1.8.1 (3). Reads were then aligned to the GRCh38 genome from Ensembl using STAR version 2.6.0c (4). Differential analysis was carried out using DESeq2 version 1.26.0 (5) on the count matrices output from snakePipes version 2.1.0 (6). For MA plots, transcripts with a baseMean > 50 reads were considered and significant differences in gene expression have absolute(log<sub>2</sub>FC) > 1 changes and adjusted p-values of < 0.05. The p-values attained by the Wald test are corrected for multiple testing using the Benjamini and Hochberg (BH) method. Data visualization was performed using ggplot2 (7). Heatmaps for gene expression of genes encoding core components of chromatin, transcription machinery and m6A RNA pathway were generated using pheatmap in R (pheatmap: Pretty heatmaps. R package version 1.0.8. <https://CRAN.Rproject.org/package=pheatmap>). GO enrichment analysis was performed with the enrichGO function from clusterProfiler R package version 3.14.3 (8) using the Biological Process ontology. P-values were adjusted using the BH method. Dotplots represent significant pathways (adjusted p-value < 0.05).

### **Intensity plots for called m6A peaks in the 3'UTR of protein-coding transcripts**

Intersection of the called m6A peaks in the 3' UTR of protein-coding transcripts between WT26 and *Mettl14* KO (6793 common peaks) and between RBC and *Mettl3* KO (2240 common peaks) data sets (see supplementary Figure S7) was performed using bedtools2 intersect version 2.27.0 (9). Coverage of the bam files normalized to the sequencing depth and inputs was computed using deepTools version 3.5.0 bamCompare (10). DeepTools computeMatrix reference point was used to generate scores per genomic region (intersection of the peaks) 3kb upstream and 3kb downstream from the center of the

peak. The heatmaps and profile of those regions were generated using deepTools plotProfile and represent the normalized coverage (intensity).

### ***In vitro* RNA:DNA hybrid formation assay**

For *in vitro* RNA:DNA hybrid formation, we used a 35 bp sequence from the subrepeat 2/3 of the MSR. This sequence codes for a RNA oligonucleotide in the forward orientation (MSR-SR2/3-FOR) that contains 10 adenosines. The MSR-SR2/3-FOR and a modified RNA oligonucleotide in which all 10 adenosines were replaced by m6A (MSR-SR2/3-FOR(m6A)) were ordered from Sigma-Aldrich, as well as the corresponding DNA forward and DNA reverse oligonucleotides. 5  $\mu$ M of DNA reverse oligonucleotide was mixed with increasing concentrations (0.1  $\mu$ M to 10  $\mu$ M) of either unmodified or m6A-modified RNA forward oligonucleotide in 1x MES buffer (2-(N-morpholino)ethanesulfonic acid 0.5 M, pH 7). Samples were denatured for 3 min at 90°C, annealed for 30 min at 37°C, incubated for 1 h at 4°C and then stored at -20°C. RNA:DNA hybrids were resolved on a 10% native polyacrylamide (19:1) gel (70 mM Tris-borate, 1.5 mM EDTA, 1% APS, 0.15% TEMED) in 0.5x TBE buffer (45 mM Tris-borate, 1 mM EDTA), stained for 15 min with 0.5x of SYBR Gold Nucleic Acid Gel Stain (Thermo Fisher Scientific) in 0.5x TBE buffer and visualized under UV light. Nucleic acids were blotted to a Hybond N+ nylon membrane (GE Healthcare) and incubated with the S9.6 antibody (Kerafast) at a 1:1,000 dilution. A goat  $\alpha$ -mouse HRP-conjugated secondary antibody (Jackson Immuno Research) was used at a 1:2,500 dilution and the signal was detected using Amersham ECL Western Blotting Detection Reagent (GE Healthcare). For the invasion of ssRNA to a dsDNA template, similar conditions were used, with the difference that a constant concentration (5  $\mu$ M) of annealed dsDNA was titrated with increasing concentrations (0.5  $\mu$ M to 10  $\mu$ M) of either unmodified or m6A-modified RNA forward oligonucleotide. The sequences of the RNA and DNA oligonucleotides used for the assay are listed in Table 1.

**Table 1. Oligonucleotides used in the study**

| Name               | Sequence 5'→3'               | Method        |
|--------------------|------------------------------|---------------|
| MSR one repeat FOR | TGGAATATGGCGAGAAACTG         | RT-qPCR, qPCR |
| MSR one repeat REV | AGGTCCTTCAGTGGGCATTT         | RT-qPCR, qPCR |
| L1MdA 5'UTR FOR    | ACTGCGGTACATAGGGAAGC         | RT-qPCR, qPCR |
| L1MdA 5'UTR REV    | TGTGATCCACTCACCAGAGG         | RT-qPCR, qPCR |
| EGFP IVT FOR       | GGCAACTACAAGACCCGCGCC        | RT-qPCR       |
| EGFP IVT REV       | GCCCTTCAGCTCGATGCGGTT        | RT-qPCR       |
| Klf4 FOR           | TTTGTAAGTCCGGGCATGTT         | RT-qPCR       |
| Klf4 REV           | GGGGTCTGATACTGGATGGA         | RT-qPCR       |
| Nanog FOR          | GGACTTTCTGCAGCCTTACG         | RT-qPCR       |
| Nanog REV          | GCTTCCAAATTCACCTCAA          | RT-qPCR       |
| Sox2 FOR           | ACATGTGAGGGCTGGACTG          | RT-qPCR       |
| Sox2 REV           | TTTTGCACCCCTCCAATTC          | RT-qPCR       |
| Pou5f1 FOR         | GTGGAGGAAGCCGACAACAATGA      | RT-qPCR       |
| Pou5f1 REV         | CAAGCTGATTGGCGATGTGAG        | RT-qPCR       |
| Gapdh FOR          | TGAACGGGAAGCTCACTGG          | RT-qPCR       |
| Gapdh REV          | TCCACCACCCTGTTGCTGTA         | RT-qPCR       |
| 28S rRNA FOR       | GTA ACTATGACTCTCTTAAGGTAGCCA | RT-qPCR       |
| 28S rRNA REV       | CTTCACCGTGCCAGACTAGAG        | RT-qPCR       |

|                           |                                                                                                 |                          |
|---------------------------|-------------------------------------------------------------------------------------------------|--------------------------|
| Hprt FOR                  | AGTGATAGATCCATTCTATGACTGTAG                                                                     | RT-qPCR                  |
| Hprt REV                  | GTTAAAGTTGAGAGATCATCTCCACC                                                                      | RT-qPCR                  |
| Zfp180 ex 5 FOR           | CCGTACAGGTGCAATCTGTG                                                                            | qPCR                     |
| Zfp180 ex 5 REV           | GTTTGTAGCTCTGGCGGAAC                                                                            | qPCR                     |
| $\beta$ -Actin prom FOR   | TTTTATGGCTCGAGTGGCCG                                                                            | qPCR                     |
| $\beta$ -Actin prom REV   | CTGCAAAGAAGCTGTGCTCG                                                                            | qPCR                     |
| Mettl3 ex 5 gRNA top      | CACCGTGAAAGAGTCGATCAGCAC                                                                        | CRISPR sgRNA             |
| Mettl3 ex 5 gRNA bottom   | AAACGTGCTGATCGACTCTTTCCAC                                                                       | CRISPR sgRNA             |
| Mettl14 ex 10 gRNA top    | CACCGCGTGAAGCGAAGCACAGACG                                                                       | CRISPR sgRNA             |
| Mettl14 ex 10 gRNA bottom | AAACCGTCTGTGCTTCGCTTCACGC                                                                       | CRISPR sgRNA             |
| Mettl3 ex5 FOR            | GCCAGGAGCTTGCTCTTACAC                                                                           | CRISPR PCR               |
| Mettl3 ex5 REV            | GTGGGTCAGCCATCACAACCTG                                                                          | CRISPR PCR               |
| Mettl14 ex10 FOR          | ACGTGGTGTGGGAAATCCTG                                                                            | CRISPR PCR               |
| Mettl14 ex10 REV          | ATCAAAACTGAGGTCTCACCTGG                                                                         | CRISPR PCR               |
| L1MdA_1                   | CGATTGGATTGGGGCAGG-biotin                                                                       | RNA capture for MS       |
| L1MdA_2                   | AGTCGAGCGGAAGGGACT-biotin                                                                       | RNA capture for MS       |
| L1MdA_3                   | ACCAGAGGTCTTAGGGTC-biotin                                                                       | RNA capture for MS       |
| GSAT_R/AS_1               | GAGAAACATCCACTTGACGA-biotin                                                                     | RNA capture for MS       |
| GSAT_R/AS_3               | CTGTAGGACGTGGAATATGG-biotin                                                                     | RNA capture for MS       |
| GSAT_R/AS_5               | GGCGAGGAAAAGTGA AAAAGG-biotin                                                                   | RNA capture for MS       |
| GSAT_R/AS_7               | GGCGAGAAAAGTGA AAAATCACG-biotin                                                                 | RNA capture for MS       |
| attB1_5' NLS FOR GW       | GGGGACAAGTTTGTACAAAAAAGCAGGCTTCCCG<br>AAGAAAAAGCGTAAAGTG                                        | protein cloning          |
| attB2_3' eGFP REV GW      | GGGGACCACTTTGTACAAGAAAGCTGGGTCTTAC<br>TTGTACAGCTCGTCCATGC                                       | protein cloning          |
| MSR_SR2_DF_Cy5            | (Cy5)GAAATATGGCGAGGAAAAGTGA AAAAGGTG<br>GAAAA                                                   | EMSA                     |
| MSR_SR2_DR                | TTTTCCACCTTTTTCAGTTTTCTCGCCATATTTTC                                                             | EMSA                     |
| MSR_SR2_RF_Cy5 (RNA)      | (Cy5)GAAAUU AUGGCGAGGAAAACUGAAAAAGGU<br>GGAAAA                                                  | EMSA                     |
| MSR_SR2_RR_Cy5 (RNA)      | (Cy5)UUUUUCCACCUUUUUCAGUUUUUCCUCGCCA<br>UAUUUC                                                  | EMSA                     |
| MSR_SR2_RR_Cy5_5mC (RNA)  | (Cy5)UUUUU[5mC] [5mC]A[5mC]<br>[5mC]UUUUU[5mC]AGUUUU[5mC]<br>[5mC]U[5mC]G[5mC] [5mC]AUUUUU[5mC] | EMSA                     |
| MSR_SR2_RR_Cy5_m6A (RNA)  | (Cy5)UUUUUCC[m6A]CCUUUUUC[m6A]GUUUUCCU<br>CGCC[m6A]U[m6A]UUUC                                   | EMSA                     |
| MSR_SR2/3_RF_m6A (RNA)    | UUU[m6A]G[m6A]U[m6A]UGUCC[m6A]CUGU[m6A]<br>GG[m6A]C[m6A]UGG[m6A][m6A]U[m6A]UGGC                 | RNA:DNA hybrid formation |
| MSR_SR2/3_RF (RNA)        | UUUAGAU AUGUCCACUGUAGGACAUGGAAUAUG<br>GC                                                        | RNA:DNA hybrid formation |
| MSR_SR2/3_DF              | TTTAGATATGTCCACTGTAGGACATGGAATATGG<br>C                                                         | RNA:DNA hybrid formation |
| MSR_SR2/3_DR              | GCCATATTCCATGTCCTACAGTGGACATATCTAAA                                                             | RNA:DNA hybrid formation |

## Reagents

### *Antibodies*

$\alpha$ -5mC, clone 10G4 (Zymo Research, USA, discontinued)

$\alpha$ -m6A (Abcam, UK, # ab190886)

S9.6 (Merck Millipore, USA, # MABE 1095)

$\alpha$ -HP1 $\alpha$ , clone 15.19s2 (Merck Millipore, USA, # 05-689)

$\alpha$ -H3K9me3 (Abcam, UK, # ab8898)

### *Kits*

RNeasy MinElute Cleanup (Qiagen, Germany, #74204)

SuperScript II Reverse Transcriptase (Thermo Fisher Scientific, USA, #18064022)

Bioanalyzer RNA 6000 Pico (Agilent, USA, #5067-1513)

Bioanalyzer RNA 6000 Nano (Agilent, USA, # 5067-1511)

Quant-iT Ribo-Green RNA Assay (Thermo Fisher Scientific, USA, #R11490)

MEGAScript T7 Transcription Kit (Thermo Fisher Scientific, USA, #AMB13345)

Qubit RNA High Sensitivity Assay (Thermo Fisher Scientific, USA, #Q32852)

TruSeq Stranded Total RNA Library Prep Gold (Illumina, USA, #20020596)

Gateway system (Thermo Fisher Scientific, USA, #12535029 and #11791019)

NEBNext Ultra Directional RNA Library Prep Kit for Illumina (NEB, USA, #E7420S)

NucleoSpin Gel and PCR Clean Up Columns (Macherey-Nagel, Germany, #740609.250)

RNA Clean & Concentrator-5 (Zymo Research, USA, #R1013)

### *Recombinant proteins*

METTL3/METTL4 (Active Motif, USA, #31570)

6xHis-MBP-NLS-HBD(H1)-eGFP (Jenuwein lab)

6xHis-MBP-NLS-eGFP (Jenuwein lab)

## Biological resources

### *Cell lines*

WT26 ES cells (Jenuwein lab)

*Suv39h* dn ES cells (Jenuwein lab)

J1 ES cells (11)

*Mettl14* KO (Jenuwein lab)

RBC (12)

*Mettl3* KO (12)

*p53*<sup>-/-</sup> MEFs (13)

*p53*<sup>-/-</sup>, *Rnaseh2*<sup>-/-</sup> (13)

COS-7 cells (ATCC, USA, #CRI-1651) expressing LIF (Jenuwein lab)

### Bacterial strains

Rosetta *E.coli* (Merck Millipore, USA, #70954)

### Plasmid vectors

pSAT-MSR-1-repeat (14)

pEX-L1MdA-1-repeat (15)

pCR4-TOPO-EGFP-S1 (Jenuwein lab)

pSpCas9(BB)-2A-Puro (pX459, Addgene, USA, #62988) (16)

pDEST-HisMBP (Addgene, USA, #11085) (17)

## SUPPLEMENTARY REFERENCES

1. Bulut-Karslioglu, A., De La Rosa-Velazquez, I.A., Ramirez, F., Barenboim, M., Onishi-Seebacher, M., Arand, J., Galan, C., Winter, G.E., Engist, B., Gerle, B. *et al.* (2014) Suv39h-dependent H3K9me3 marks intact retrotransposons and silences LINE elements in mouse embryonic stem cells. *Mol Cell*, **55**, 277-290.
2. Andrews, S. (2010) FastQC: a quality control tool for high throughput sequence data. <http://www.bioinformatics.babraham.ac.uk/projects/fastqc>.
3. Martin, M. (2011) Cutadapt removes adapter sequences from high-throughput sequencing reads. *2011*, **17**, 3.
4. Dobin, A., Davis, C.A., Schlesinger, F., Drenkow, J., Zaleski, C., Jha, S., Batut, P., Chaisson, M. and Gingeras, T.R. (2013) STAR: ultrafast universal RNA-seq aligner. *Bioinformatics (Oxford, England)*, **29**, 15-21.
5. Love, M.I., Huber, W. and Anders, S. (2014) Moderated estimation of fold change and dispersion for RNA-seq data with DESeq2. *Genome biology*, **15**, 550.
6. Bhardwaj, V., Heyne, S., Sikora, K., Rabbani, L., Rauer, M., Kilpert, F., Richter, A.S., Ryan, D.P. and Manke, T. (2019) snakePipes: facilitating flexible, scalable and integrative epigenomic analysis. *Bioinformatics (Oxford, England)*, **35**, 4757-4759.
7. Wickham, H. (2009) *Ggplot2: Elegant Graphics for Data Analysis. 2nd Edition*. Springer, New York.
8. Yu, G., Wang, L.G., Han, Y. and He, Q.Y. (2012) clusterProfiler: an R package for comparing biological themes among gene clusters. *OmicS : a journal of integrative biology*, **16**, 284-287.
9. Quinlan, A.R. and Hall, I.M. (2010) BEDTools: a flexible suite of utilities for comparing genomic features. *Bioinformatics (Oxford, England)*, **26**, 841-842.
10. Ramirez, F., Ryan, D.P., Grüning, B., Bhardwaj, V., Kilpert, F., Richter, A.S., Heyne, S., Dündar, F. and Manke, T. (2016) deepTools2: a next generation web server for deep-sequencing data analysis. *Nucleic Acids Res*, **44**, W160-165.
11. Li, E., Bestor, T.H. and Jaenisch, R. (1992) Targeted mutation of the DNA methyltransferase gene results in embryonic lethality. *Cell*, **69**, 915-926.
12. Knuckles, P., Carl, S.H., Musheev, M., Niehrs, C., Wenger, A. and Buhler, M. (2017) RNA fate determination through cotranscriptional adenosine methylation and microprocessor binding. *Nat Struct Mol Biol*, **24**, 561-569.
13. Reijns, M.A., Rabe, B., Rigby, R.E., Mill, P., Astell, K.R., Lettice, L.A., Boyle, S., Leitch, A., Keighren, M., Kilanowski, F. *et al.* (2012) Enzymatic removal of ribonucleotides from DNA is essential for mammalian genome integrity and development. *Cell*, **149**, 1008-1022.
14. Lehnertz, B., Ueda, Y., Derijck, A.A., Braunschweig, U., Perez-Burgos, L., Kubicek, S., Chen, T., Li, E., Jenuwein, T. and Peters, A.H. (2003) Suv39h-mediated histone H3 lysine 9 methylation directs DNA methylation to major satellite repeats at pericentric heterochromatin. *Current biology : CB*, **13**, 1192-1200.
15. Velazquez Camacho, O., Galan, C., Swist-Rosowska, K., Ching, R., Gamalinda, M., Karabiber, F., De La Rosa-Velazquez, I., Engist, B., Koschorz, B., Shukeir, N. *et al.* (2017) Major satellite repeat RNA stabilize heterochromatin retention of Suv39h enzymes by RNA-nucleosome association and RNA:DNA hybrid formation. *Elife*, **6**.

16. Ran, F.A., Hsu, P.D., Wright, J., Agarwala, V., Scott, D.A. and Zhang, F. (2013) Genome engineering using the CRISPR-Cas9 system. *Nature protocols*, **8**, 2281-2308.
17. Nallamsetty, S., Austin, B.P., Penrose, K.J. and Waugh, D.S. (2005) Gateway vectors for the production of combinatorially-tagged His6-MBP fusion proteins in the cytoplasm and periplasm of *Escherichia coli*. *Protein science : a publication of the Protein Society*, **14**, 2964-2971.
18. Batista, P.J., Molinie, B., Wang, J., Qu, K., Zhang, J., Li, L., Bouley, D.M., Lujan, E., Haddad, B., Daneshvar, K. *et al.* (2014) m(6)A RNA modification controls cell fate transition in mammalian embryonic stem cells. *Cell Stem Cell*, **15**, 707-719.

## SUPPLEMENTARY FIGURE LEGENDS

**Supplementary Figure S1. Workflow and quality control for MeRIP in the detection of 5mC or m6A containing hetRNA.** (A) Workflow for the optimization of the MeRIP protocol to detect 5mC or m6A RNA modification of MSR and LINE L1MdA 5'UTR repeat transcripts in nuclear RNA from WT26 or *Suv39h* dn mouse ES cells. (B) m6A MeRIP analysis of control mRNA transcripts that have been shown to be m6A-positive (*Klf4*, *Nanog*, *Sox2*) or m6A-negative (*Pou5f1*) (18). Enrichment is calculated as the percentage of m6A-positive transcripts over the total amount of input transcripts (left panel). As an additional control, 1 ng of fully m6A methylated *EGFP in vitro* transcripts (IVT) were spiked into nuclear RNA of WT26 and *Suv39h* dn ES cells, followed by detection with m6A MeRIP (right panel). The data represent the mean  $\pm$  SD from n=3 biological replicates.

**Supplementary Figure S2. Workflow and quality control for the capture of MSR reverse transcripts and of LINE L1MdA 5'UTR forward transcripts.** (A) Workflow for the capture of MSR reverse and LINE L1MdA 5'UTR forward transcripts in nuclear RNA from J1 WT ES cells by biotinylated DNA probes. 6 ng of MSR-captured RNA and 3 ng of LINE L1MdA 5'UTR-captured RNA was used in a MiSeq analysis to control for the quality and specificity of the enriched sequences prior to LC-MS/MS mass spectrometry. (B) MiSeq sequencing results for MSR-captured RNA (left) and for LINE L1MdA 5'UTR-captured RNA (right) are displayed as reads per kilobase of transcript, per million mapped reads (RPKM) for the most highly enriched RNA sequences.

**Supplementary Figure S3. Generation and confirmation of the CRISPR/Cas9 mediated *Mettl14* mutation in the A10 ES cell clone.** (A) Schematic diagram of the *Mettl3* and *Mettl14* gene loci and domain organization of their encoded proteins. The MT-A70 domain is encoded by exons 5-11 for *Mettl3* and by exons 8-11 for *Mettl14*. We used sgRNAs targeting exon 5 of *Mettl3* and exon 10 of *Mettl14*. Primers used for the surveyor assay and for genotyping are depicted by black arrows, as are the lengths (in bp) of their PCR amplicons. (B) Surveyor assay on genomic DNA of WT26 ES cells (mixed cell population) co-transfected with *Mettl3* and *Mettl14* sgRNA (+ sgRNA) compared to transfection control (- sgRNA). White asterisks indicate mutated PCR products. (C) Sequence analysis of exon 10 of *Mettl14* in PCR products derived from WT26 and A10 clone genomic DNA. For the A10 ES cell clone, only mutated PCR sequences were obtained, indicating a homozygous mutation. This homozygote mutation

is a 4 bp deletion (highlighted in blue) that results in a premature stop codon leading to a truncated (311 aa) *Mettl14* protein with an impaired MT-A70 domain.

**Supplementary Figure S4. Analysis of gene expression in WT26, *Mettl14* KO, RBC and *Mettl3* KO ES cells.** HiSeq RNA sequencing (75 bp, paired end) was performed on nuclear RNA from WT26, *Mettl14* KO, RBC and *Mettl3* KO ES cells. Reads were quantified using TEtranscripts and differentially expressed genes were determined using DESeq2 (see Materials and methods). **(A)** MA-plots depicting changes in genes expression in *Mettl14* KO relative to WT26 (left) and *Mettl3* KO relative to RBC (right) ES cells. The total number of up- and downregulated genes is indicated in the plots. **(B)** Gene ontology (GO) analysis of genes differentially expressed in *Mettl14* KO relative to WT26 (left) and *Mettl3* KO relative to RBC (right) ES cells. GO terms (biological processes) with differentially expressed genes are named on the left side of the plots. The x-axis indicates the percentage of differentially expressed genes in a given GO term. The size of the dot specifies the total number of genes annotated in a given GO term. All data represent the mean from n=2 biological replicates.

**Supplementary Figure S5. Heat maps of differential gene expression for genes encoding core components of chromatin, the transcription machinery and the m6A RNA pathway in WT26/*Mettl14* KO and in RBC/*Mettl3* KO ES cells.** HiSeq RNA sequencing (75 bp, paired end) was performed on nuclear RNA from WT26, *Mettl14* KO, RBC and *Mettl3* KO ES cells. Reads were quantified using TEtranscripts and differentially expressed genes were determined using DESeq2 (see Materials and methods). A canon of genes encoding described core components of chromatin (around 200 genes), the transcription machinery (around 200 genes) and the m6A RNA pathway (around 30 genes) was selected and heat maps for their differential gene expression between WT26/*Mettl14* KO and between RBC/*Mettl3* KO ES cells were generated. Only genes with a baseMean expression of > 50 reads are shown and of those only very few have a statistically significant (adjusted p-value < 0.05 and absolute(log2FoldChange) > 1) change in gene expression between WT26/*Mettl14* and RBC/*Mettl3* ES cells (marked by an asterisk). There were also no significant alterations for expression of *RNaseH1* and *RNaseH2* genes. The data are from n=2 biological replicates (rep1 and rep2).

**Supplementary Figure S6. Bioinformatic analysis of m6A enriched non-repeat RNA.** HiSeq RNA sequencing libraries (75 bp, paired-end) were prepared from m6A-enriched nuclear RNA of WT26/RBC and of *Mettl14*/*Mettl3* KO ES cells. Pie charts indicate the distribution of called m6A peaks in non-repeat RNA from WT26 and RBC **(A)** and from *Mettl14* KO and *Mettl3* KO **(B)** ES cells. The total number of called m6A peaks detected on the sense (+) and antisense (-) RNA strands is indicated above the pie charts. In WT26 and RBC samples, the RRACH motif (boxed) is the most prevalent sequence motif underlying m6A peaks in 3'UTR regions of non-repeat RNA. The data represent the mean from n=2 biological replicates.

**Supplementary Figure S7. Intensity plots for m6A peak calling in the 3'UTR of coding transcripts from WT26/*Mettl14* KO and from RBC/*Mettl3* KO samples.** The data were derived from Figure S6 and called m6A peaks from the segment for enrichment in 3'UTR of coding transcripts were selected. There are 6793 common m6A 3'UTR peaks between WT26 and *Mettl14* KO and 2240 common m6A



3'UTR peaks between RBC and *Mettl3* KO data sets. The intensity of these intersected m6A peaks within a -3kb to +3kb region from the peak center is shown in the plots. The data represent the mean from n=2 biological replicates.

**Supplementary Figure S8. Immunofluorescence and ChIP analysis for H3K9me3 in WT26 and *Mettl14* KO and in RBC and *Mettl3* KO ES cells. (A)** IF images of WT26 and *Mettl14* KO and of RBC and *Mettl3* KO ES cells stained with DAPI and with  $\alpha$ -H3K9me3 and  $\alpha$ -HP1 $\alpha$  antibodies. Scale bar = 5  $\mu$ M. **(B)** Directed ChIP analysis for H3K9me3 accumulation at the MSR or LINE L1MdA 5'UTR repeats in WT26 and *Mettl14* KO and in RBC and *Mettl3* KO ES cells (top panels). As controls, H3K9me3 ChIP was also done for *Zfp180* exon 5 (positive control) and the  *$\beta$ -actin* gene promoter (negative control) (lower panels). Enrichment is calculated as the percentage of H3K9me3-enriched qPCR signal compared to input qPCR signal. The data represent the mean  $\pm$  SD from n=2 biological replicates.

**Supplementary Figure S9. Quantification of the subcellular distribution of *Gapdh*, *Hprt*, LINE L1MdA 5'UTR and MSR transcripts in WT26/RBC and in *Mettl14* /*Mettl3* KO ES cells. (A)** Histogram showing the distribution of *Gapdh*, *Hprt*, LINE L1MdA 5'UTR and MSR transcripts in cytoplasmic (white), nucleoplasmic (grey) and chromatin (black) fractions of WT26, *Mettl14* KO, RBC and *Mettl3* KO ES cells. RNA was isolated from each of the subcellular fractions and specific transcripts were quantified by directed RT-qPCR. The relative abundance of transcripts in each subcellular fraction is displayed as the percentage of total transcripts in all three subcellular fractions. Statistical significance for differences in transcript distribution between cytoplasmic, nucleoplasmic and chromatin fractions within each of the *Gapdh*, *Hprt*, L1MdA 5'UTR and MSR data sets was confirmed by unpaired two-tailed t-test. For clarity, these p-values are not shown. Differences in transcript distribution between WT and mutant samples are statistically significant only for the increase in nucleoplasmic MSR transcripts in both *Mettl14* KO and *Mettl3* KO samples, which is highlighted in (B). **(B)** Zoom-in histogram of the relative abundance of *Gapdh*, *Hprt*, L1MdA 5'UTR and MSR transcripts in the nucleoplasmic fraction of WT26, *Mettl14* KO, RBC and *Mettl3* KO ES cells, extracted from the graph in (A). Statistical significance was analyzed by unpaired two-tailed t-test and the p-values are indicated. All data represent the mean from n=3 biological replicates.

**Supplementary Figure S10. Characterization of the recombinant hybrid binding domain (HBD) of mouse RNase H1 as a new reagent for the detection of RNA:DNA hybrids. (A)** Schematic diagram of the 6xHis-MBP-NLS-HBD(H1)-eGFP fusion construct that contains the hybrid binding domain (amino acids 27 to 76) of the mouse RNase H1 enzyme. The 6xHis-MBP-tag is on the N-terminus and the eGFP tag on the C-terminus. The dot indicates the AcTEV cleavage site and NLS is a nuclear localization signal. Also shown is the 6xHis-MBP-NLS-eGFP control construct. **(B)** Coomassie staining of purified HBD(H1)-eGFP (left) or eGFP (right) after AcTEV cleavage. Bands corresponding to the size of HBD(H1)-eGFP and eGFP are indicated with arrows. kDa = kilodalton. **(C)** RDIP (with HBD(H1)-eGFP) of chromatin-associated, phenol/chloroform-extracted NA from *p53*<sup>-/-</sup> control and *p53*<sup>-/-</sup>; *Rnaseh2*<sup>-/-</sup> MEFs. Prior to the enrichment with HBD(H1)-eGFP, NA were either untreated or treated for 2 h at 4°C with RNase H (Roche). After the enrichment with HBD(H1)-eGFP, RNA:DNA hybrids were detected

by RNA amplification using RT-qPCR. The data represent the mean  $\pm$  SD from n=2 biological replicates. Statistical significance was determined by paired two-tailed t-test and the p-values are indicated.

**Supplementary Figure S11. RDIP signal detection of MSR RNA:DNA hybrids by DNA vs. RNA amplification.** (A) Workflow for the RDIP analysis to detect RNA:DNA MSR hybrids by DNA amplification. After enrichment with HBD(H1)-eGFP or with the S9.6 antibody, DNA was isolated and directly used for qPCR. The histogram shows the MSR RDIP signal for chromatin-associated, phenol/chloroform-extracted NA from WT26 ES cells. RDIP was performed with untreated or RNase H (Roche) treated (2 hours at 4°C) NA that were probed with HBD(H1)-eGFP (left panel) or with the S9.6 antibody (right panel). (B) Workflow for the RDIP analysis to detect RNA:DNA MSR hybrids by RNA amplification. After enrichment with HBD(H1)-eGFP or with the S9.6 antibody, RNA was isolated, double DNase digested and used for RT-qPCR. The histogram shows the MSR RDIP signal for chromatin-associated, phenol/chloroform-extracted NA from WT26 ES cells. The data are calculated as percentage of HBD(H1)-eGFP or S9.6-enriched signal compared to the input signal. The data represent the mean  $\pm$  SD from n=3 biological replicates. Statistical significance was determined by paired two-tailed t-test and the p-values are indicated.

**Supplementary Figure S12. Detection of RNA:DNA hybrids by RDIP with S9.6 antibody.**

(A) Electrophoretic mobility shift assay (EMSA) with S9.6 antibody and RNA:DNA hybrids that were generated by annealing ssRNA (35 nt) or ssDNA oligonucleotides (35 nt) from MSR subrepeat 2. RNA:DNA hybrids contain either unmodified (unmod) or 5mC- (5mC) or m6A-modified (m6A) RNA oligonucleotides. (B) Histogram showing RDIP (using the S9.6 antibody) of chromatin-associated, phenol/chloroform extracted NA from WT26, *Mettl14* KO, RBC and *Mettl3* KO ES cells. Prior to the enrichment with the S9.6 antibody, NA were either untreated (grey or hatched bars) or incubated for 2 hours at 4°C with RNase H (Roche) (white bars). MSR (left) and LINE L1MdA 5'UTR (right) RNA:DNA hybrids were detected by RNA amplification using RT-qPCR. The data are calculated as percentage of S9.6 enriched signal compared to the input signal in each sample. The data represent the mean  $\pm$  SD from n=5 biological replicates. Statistical significance between untreated and RNase H treated samples was determined by paired two-tailed t-test and the p-values are indicated. Statistical significance between untreated wt and untreated mutant samples was determined by unpaired two tailed t-test and the p-values are indicated.

**Supplementary Figure S13. *In vitro* RNA:DNA hybrid formation.** (A) Diagram showing the sequence of a 35 nt RNA oligonucleotide derived from the subrepeat 2/3 of the MSR. This RNA oligonucleotide is in the forward orientation (MSR-SR2/3-FOR) and contains 10 adenosines, which were either left unmodified or replaced by m6A (indicated by blue hexagon). (B) Constant (5  $\mu$ M) concentration of complementary ssDNA oligonucleotides were annealed to increasing (0.1–10  $\mu$ M) concentrations of MSR-SR2/3-FOR or MSR-SR2/3-FOR(m6A) RNA oligonucleotides, resolved on polyacrylamide gel and stained with SYBR Gold (upper panel). The nucleic acids were then blotted and RNA:DNA hybrids were detected with the S9.6 antibody (lower panel). (C) The same as in (B), but increasing (0.5–10  $\mu$ M) concentrations of MSR-SR2/3-FOR or MSR-SR2/3-FOR(m6A) RNA oligonucleotides were annealed to

a constant concentration (5  $\mu\text{M}$ ) of complementary dsDNA, probing the ability of the RNA to invade a DNA duplex and to form RNA:DNA hybrids. We could not perform the same experiment with the HBD(H1)-eGFP reagent, as the recombinant HBD(H1)-eGFP did not work on Hybond N+ (GE Healthcare) membranes.

**A**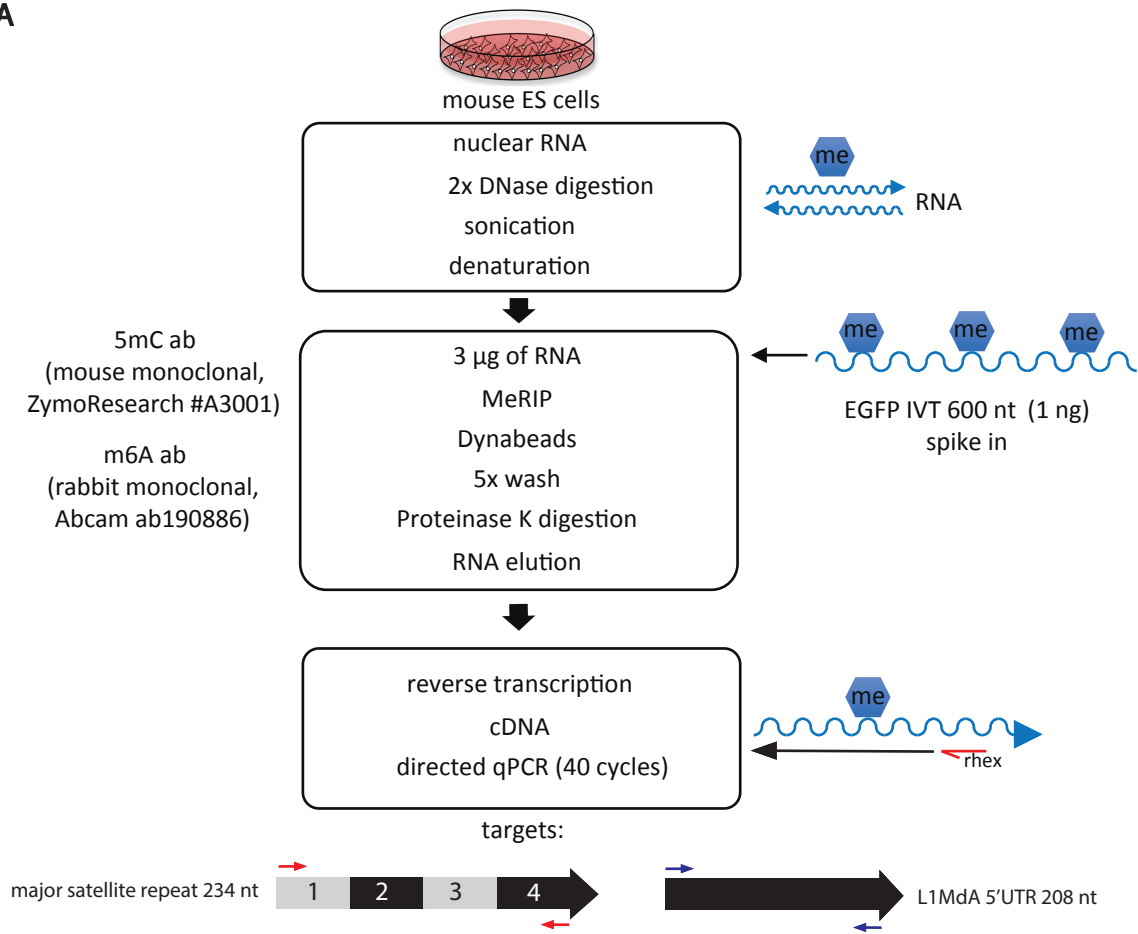**B**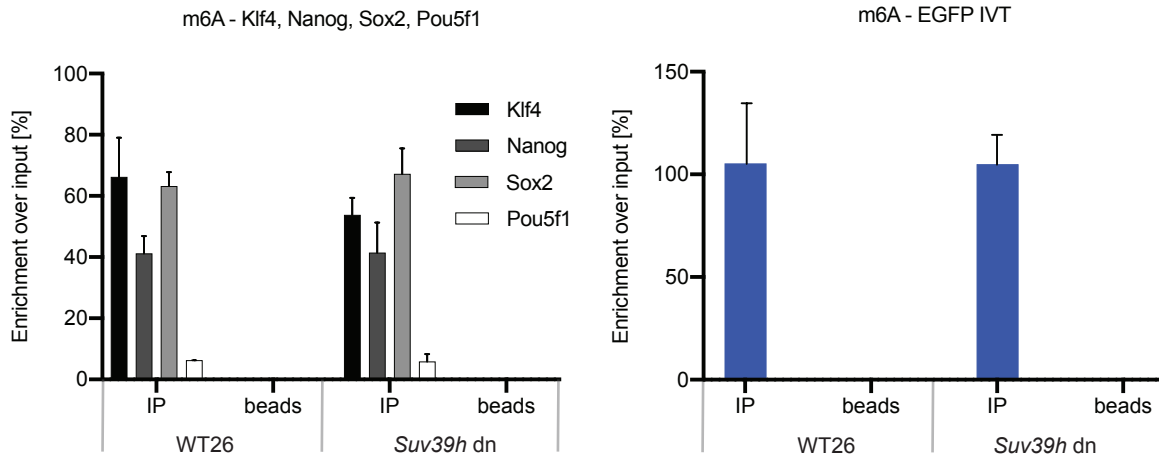

Figure S1

A

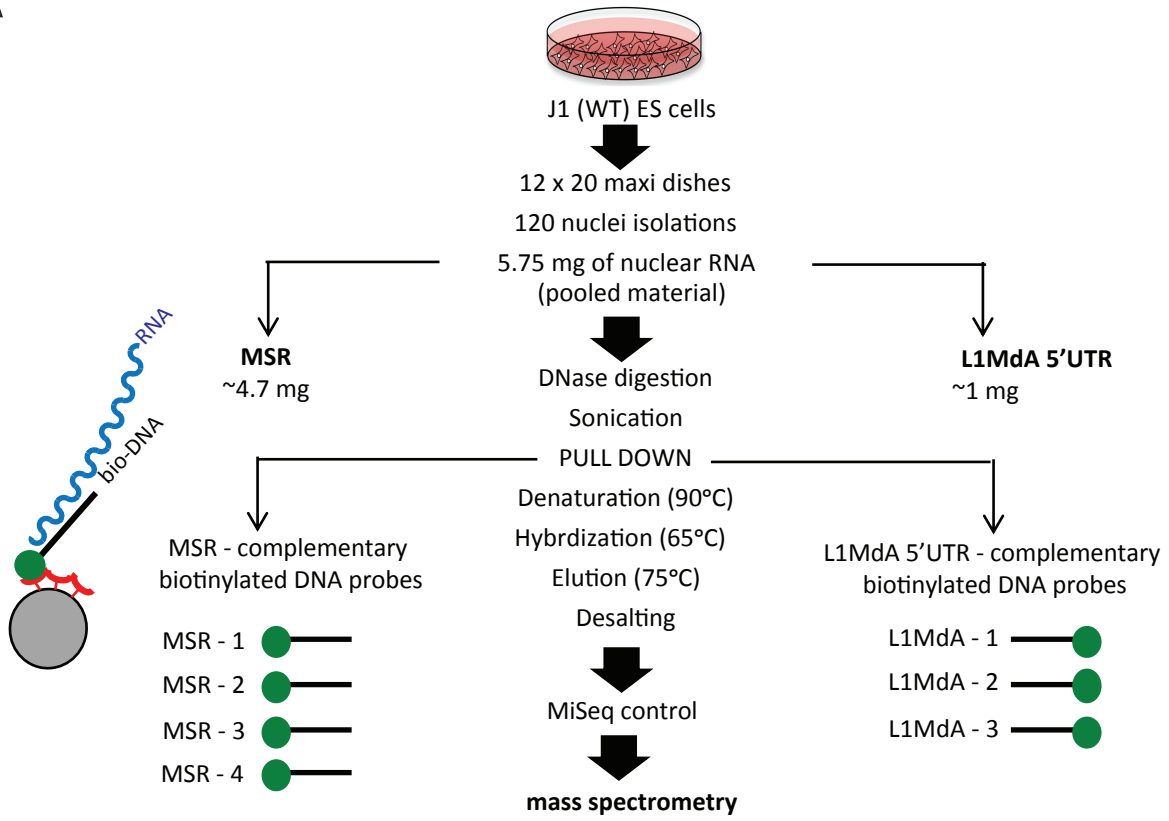

B

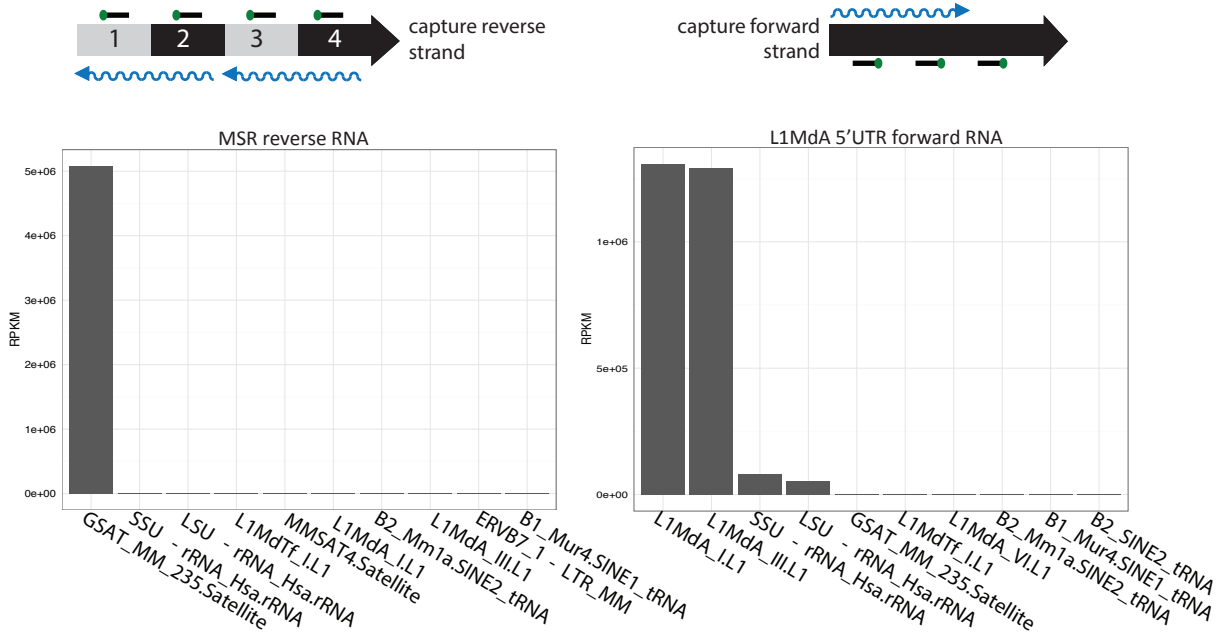

Figure S2

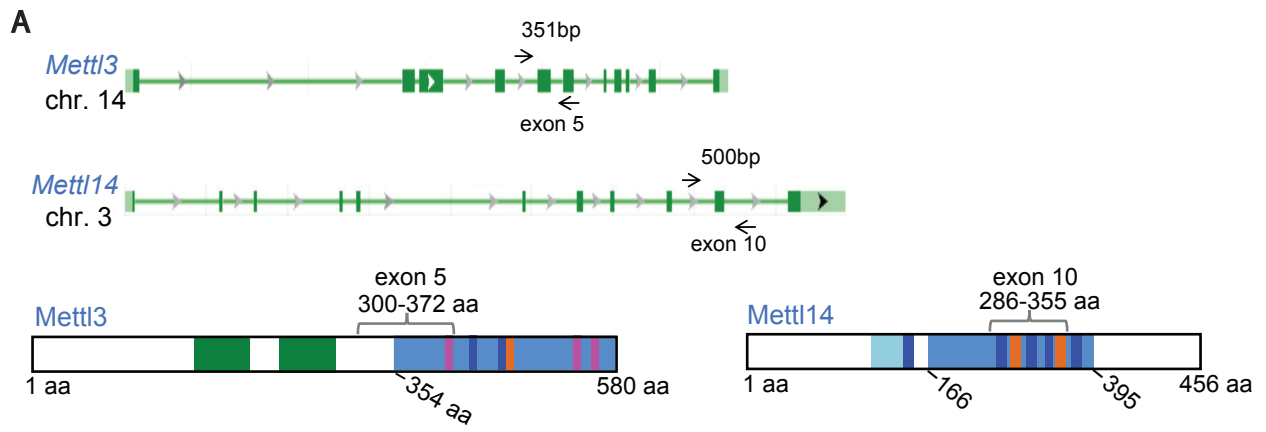

**B**

**Surveyor assay - WT26 (ES)**

mixed cell population: *Mettl3* ex5/*Mettl14* ex10  
amplicon: *Mettl3* ex5 *Mettl14* ex10

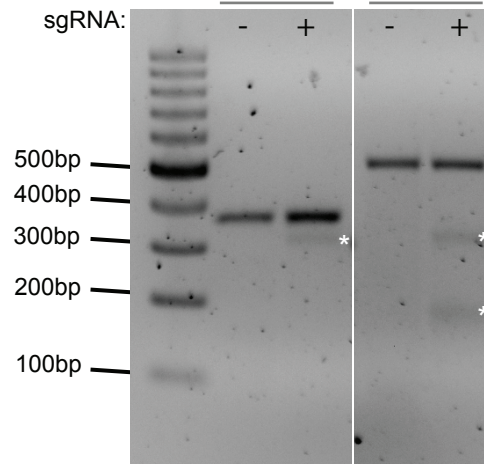

192 clones  
→ 1 homozygote mutant

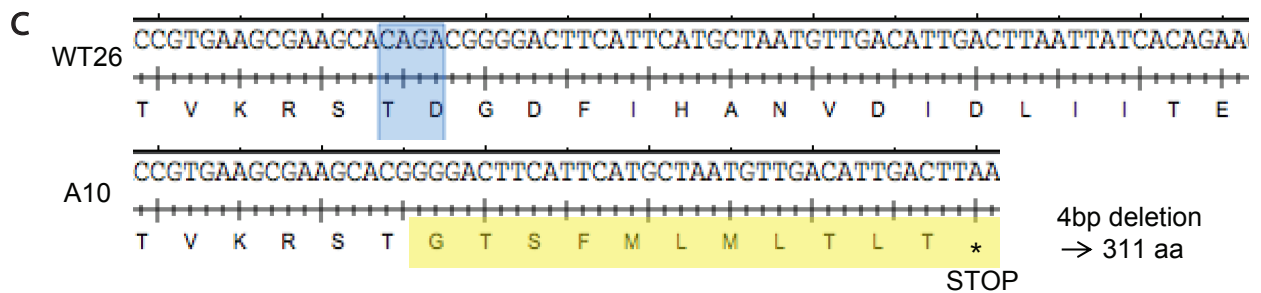

Figure S3

**A**

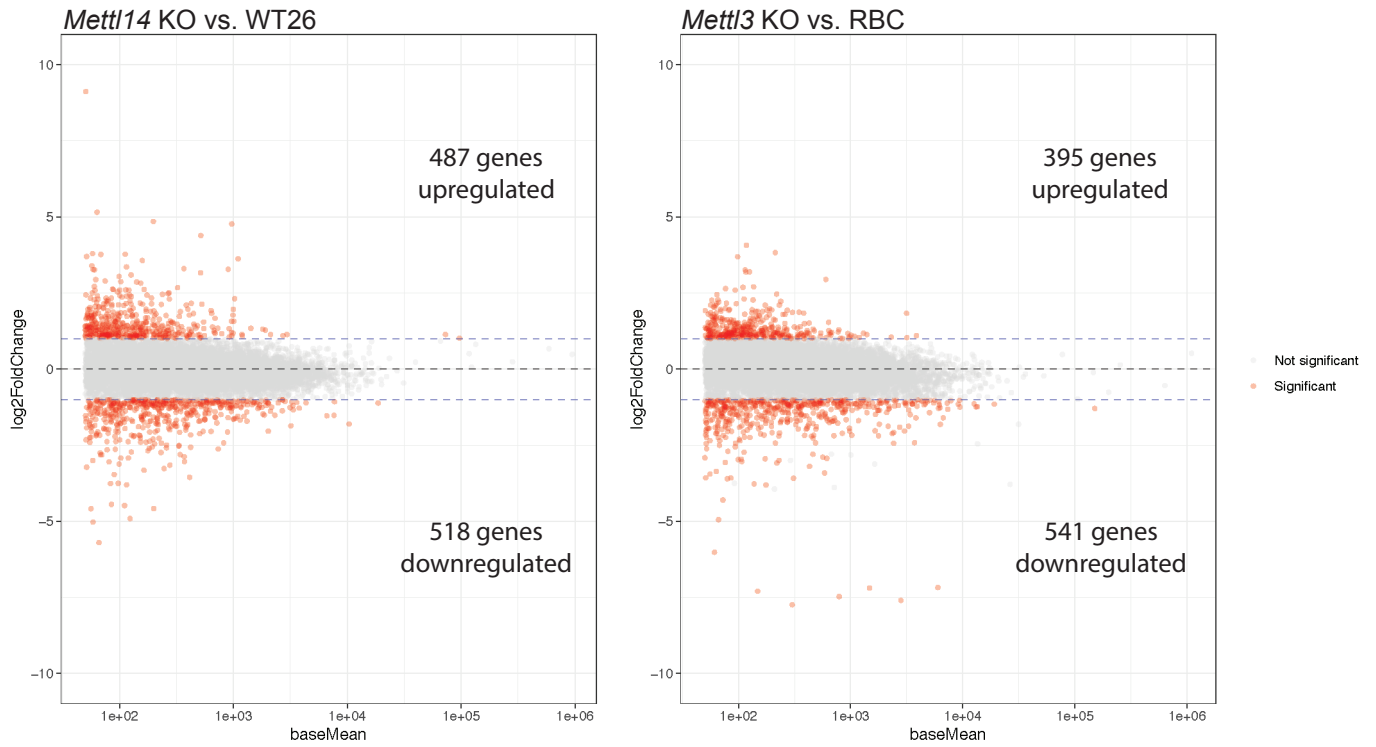

**B**

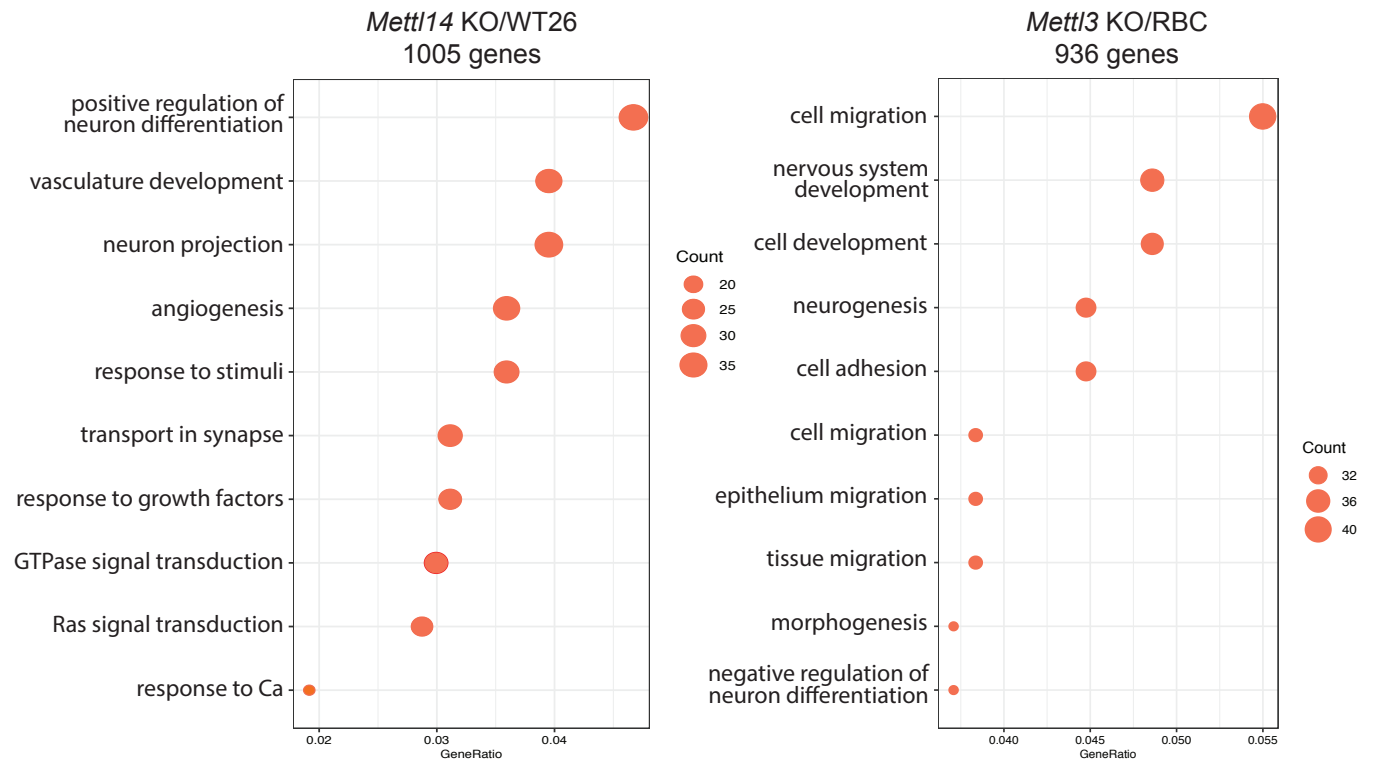

Figure S4

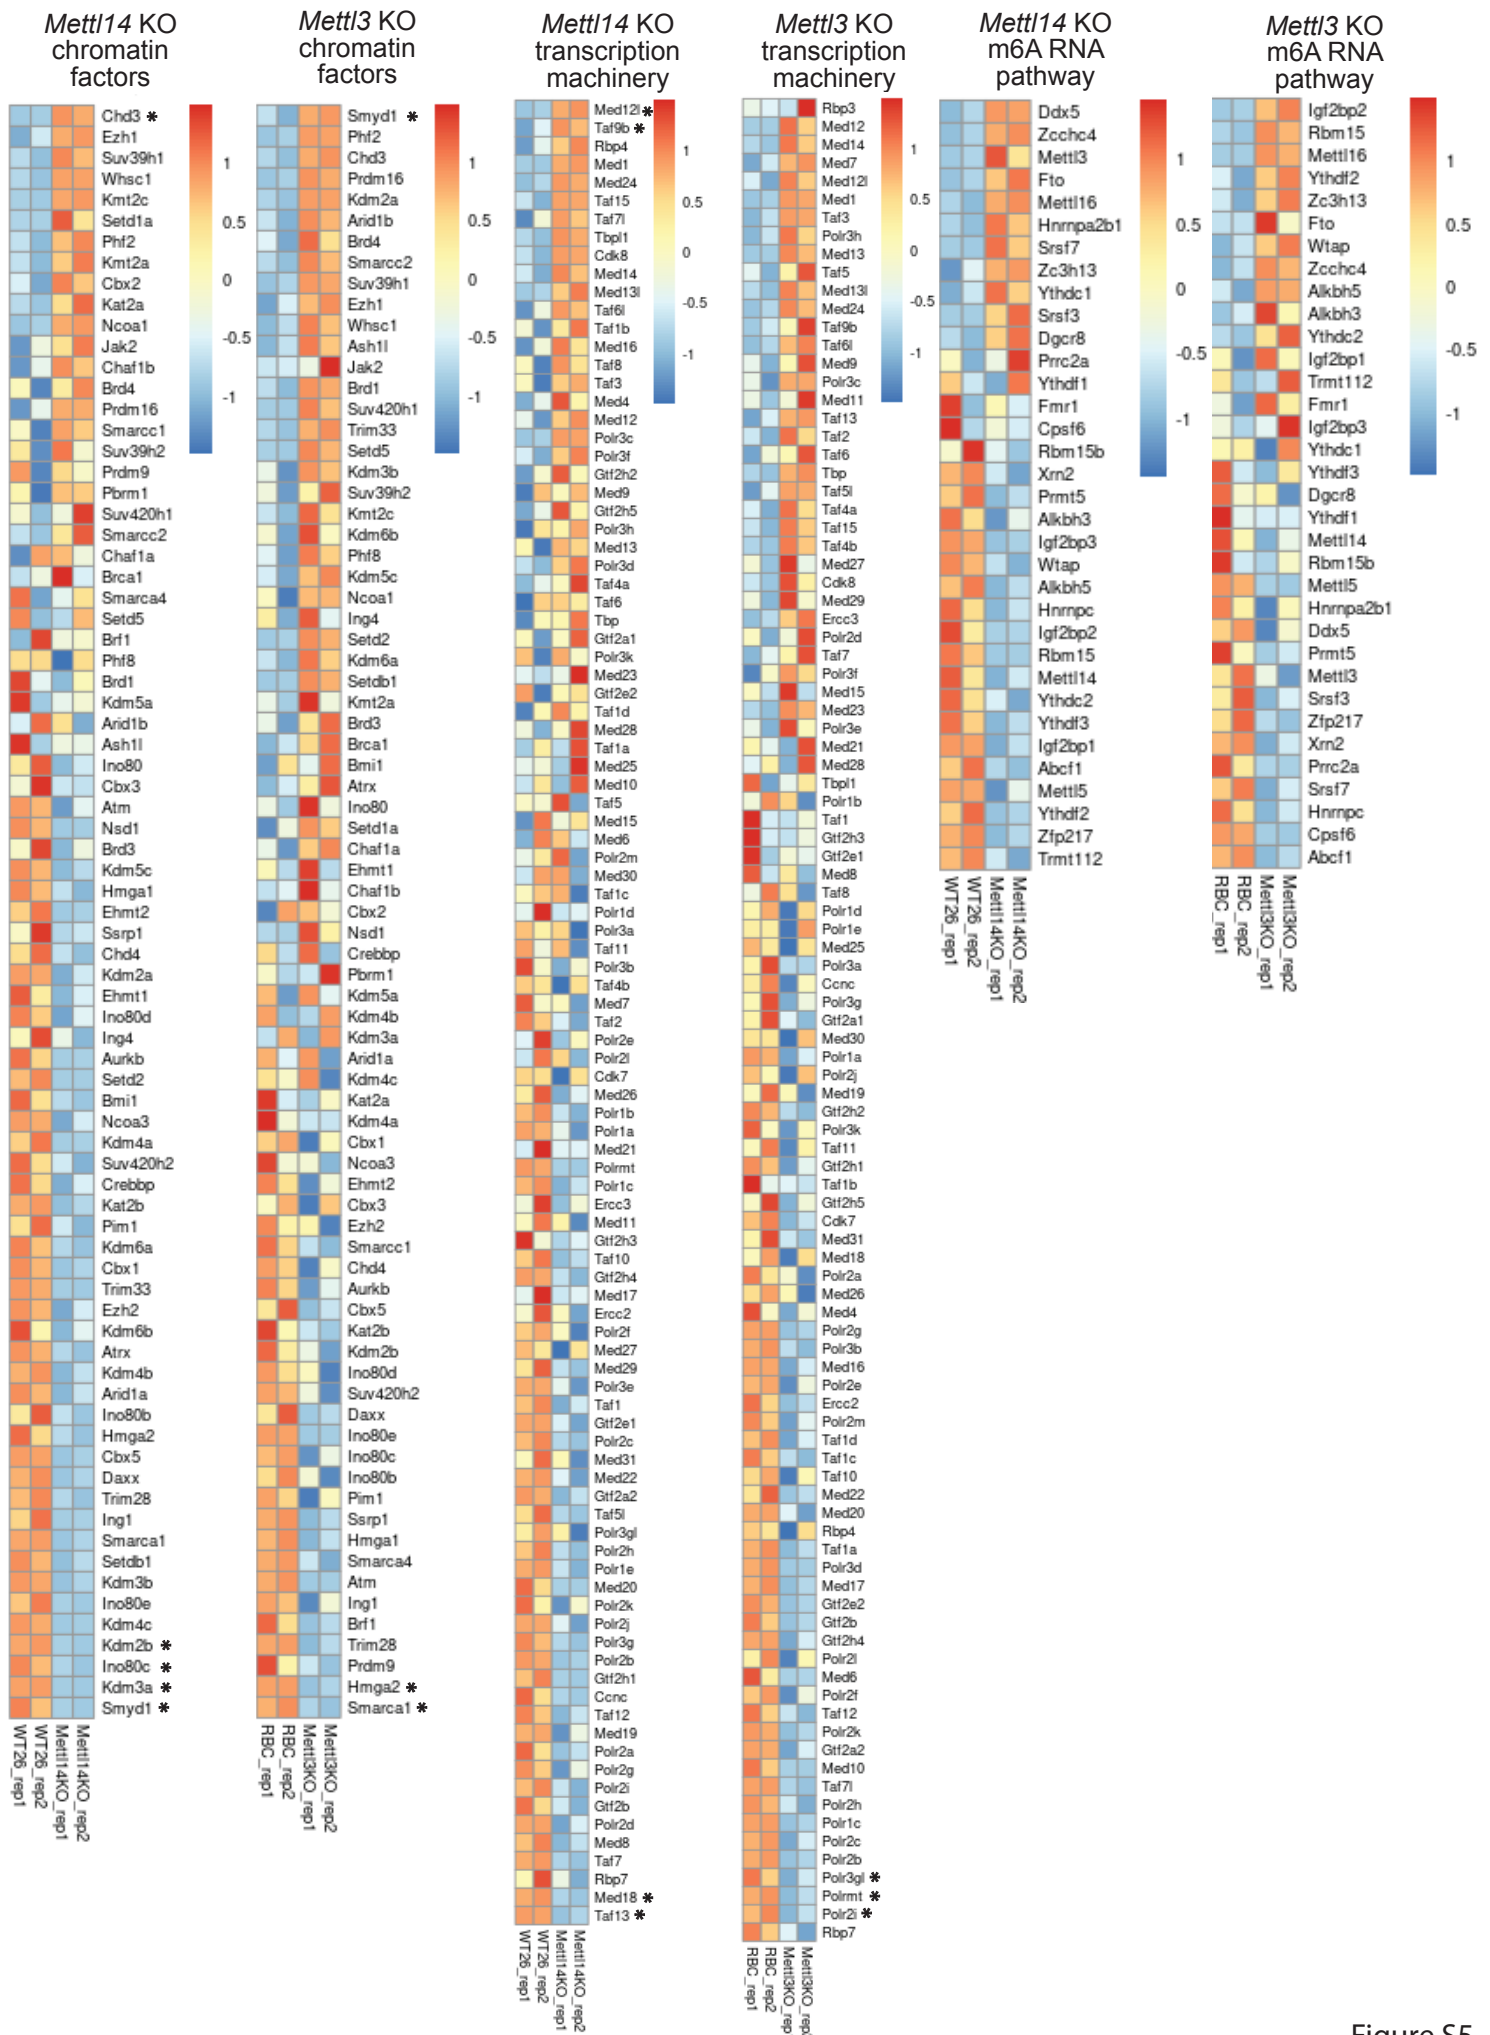

Figure S5



**A**

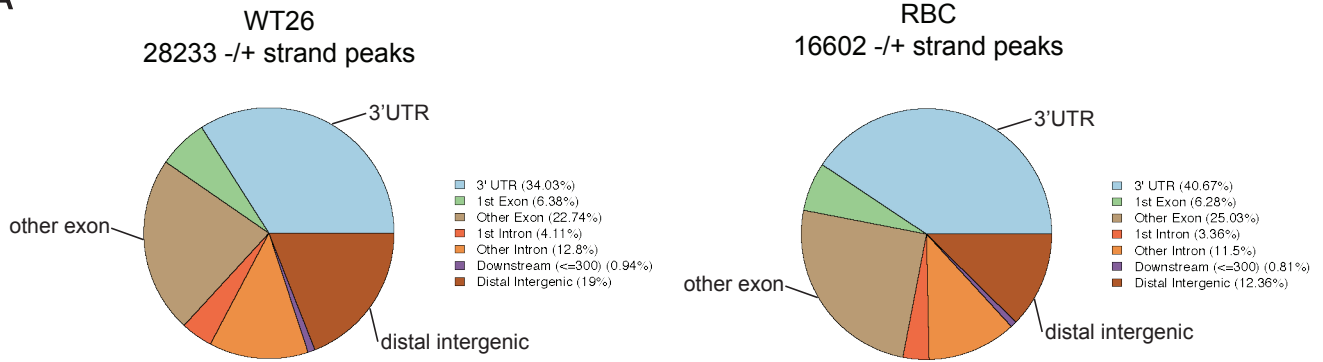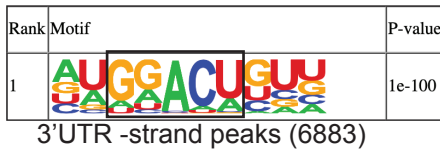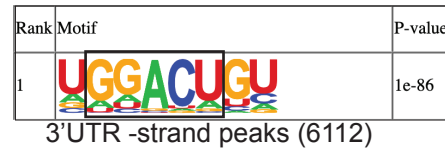

**B**

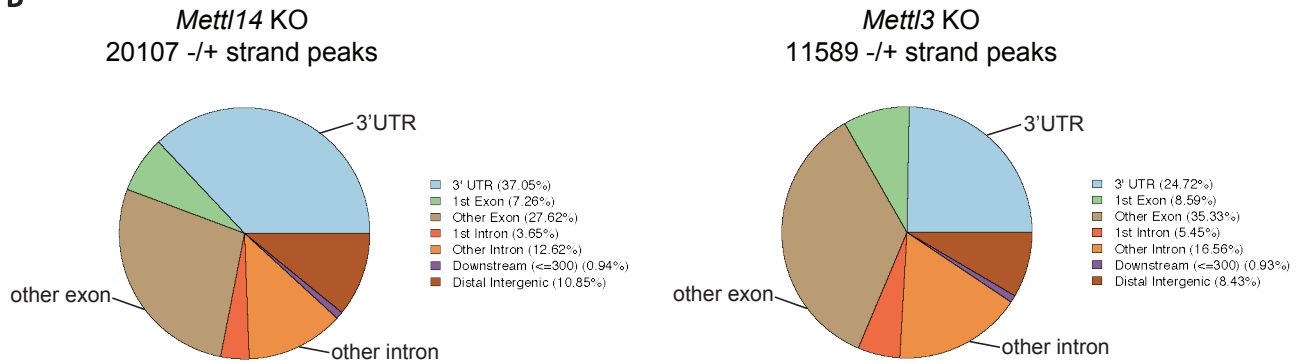

Figure S6

Intersection of 3'UTR m6A peaks  
WT26 and *Mettl14* KO

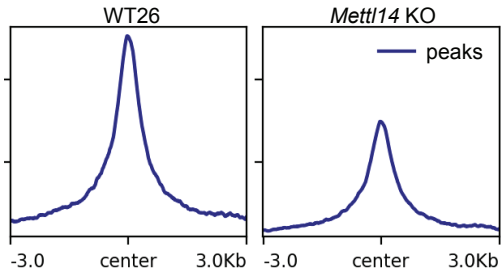

Intersection of 3'UTR m6A peaks  
RBC and *Mettl3* KO

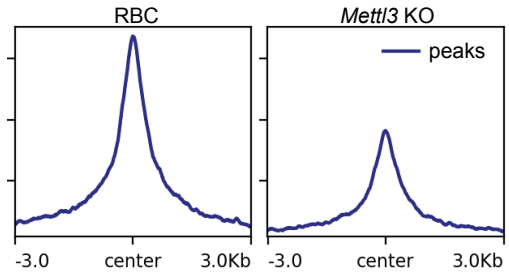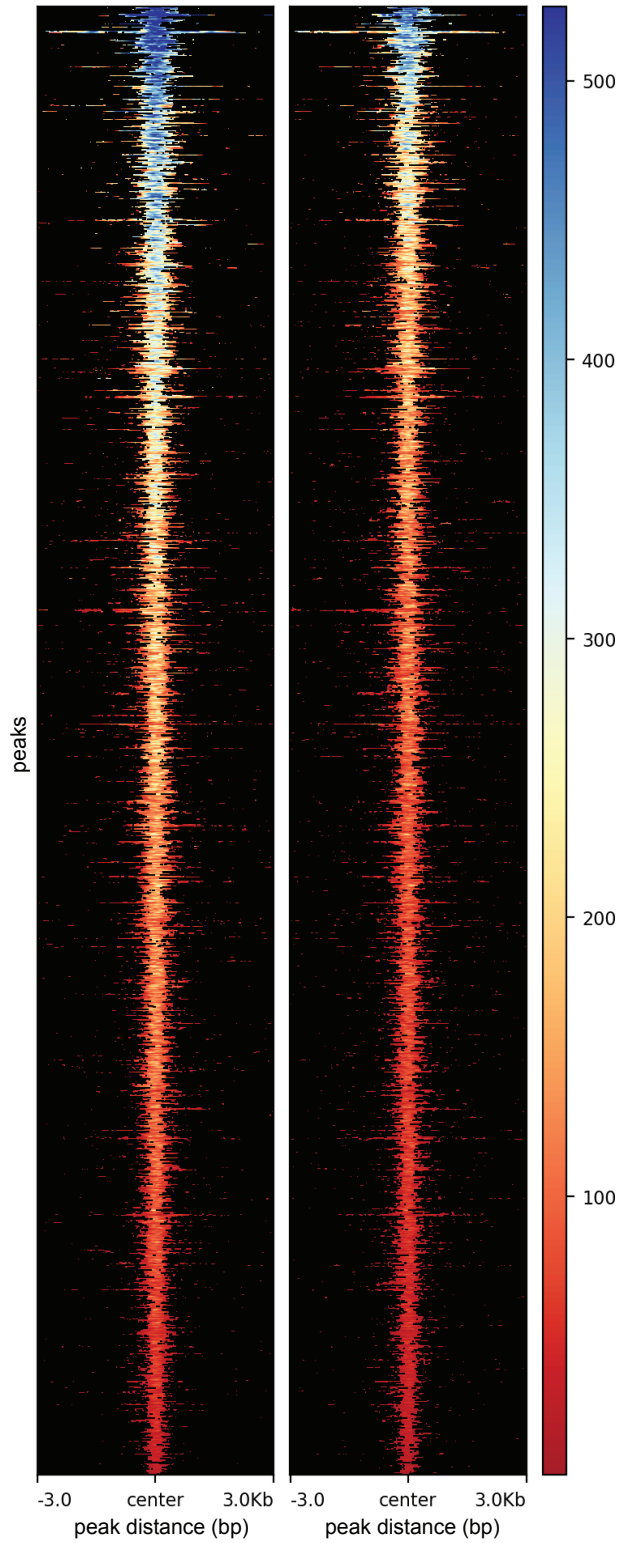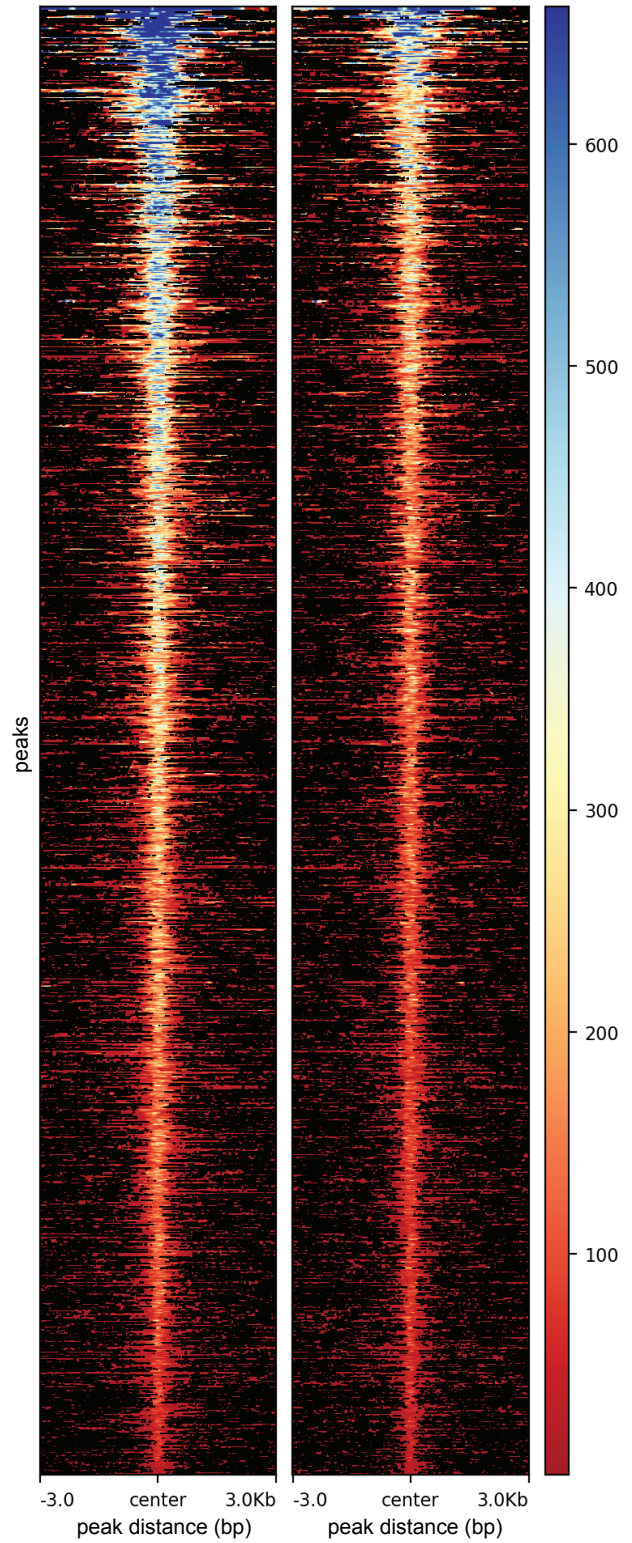

Figure S7

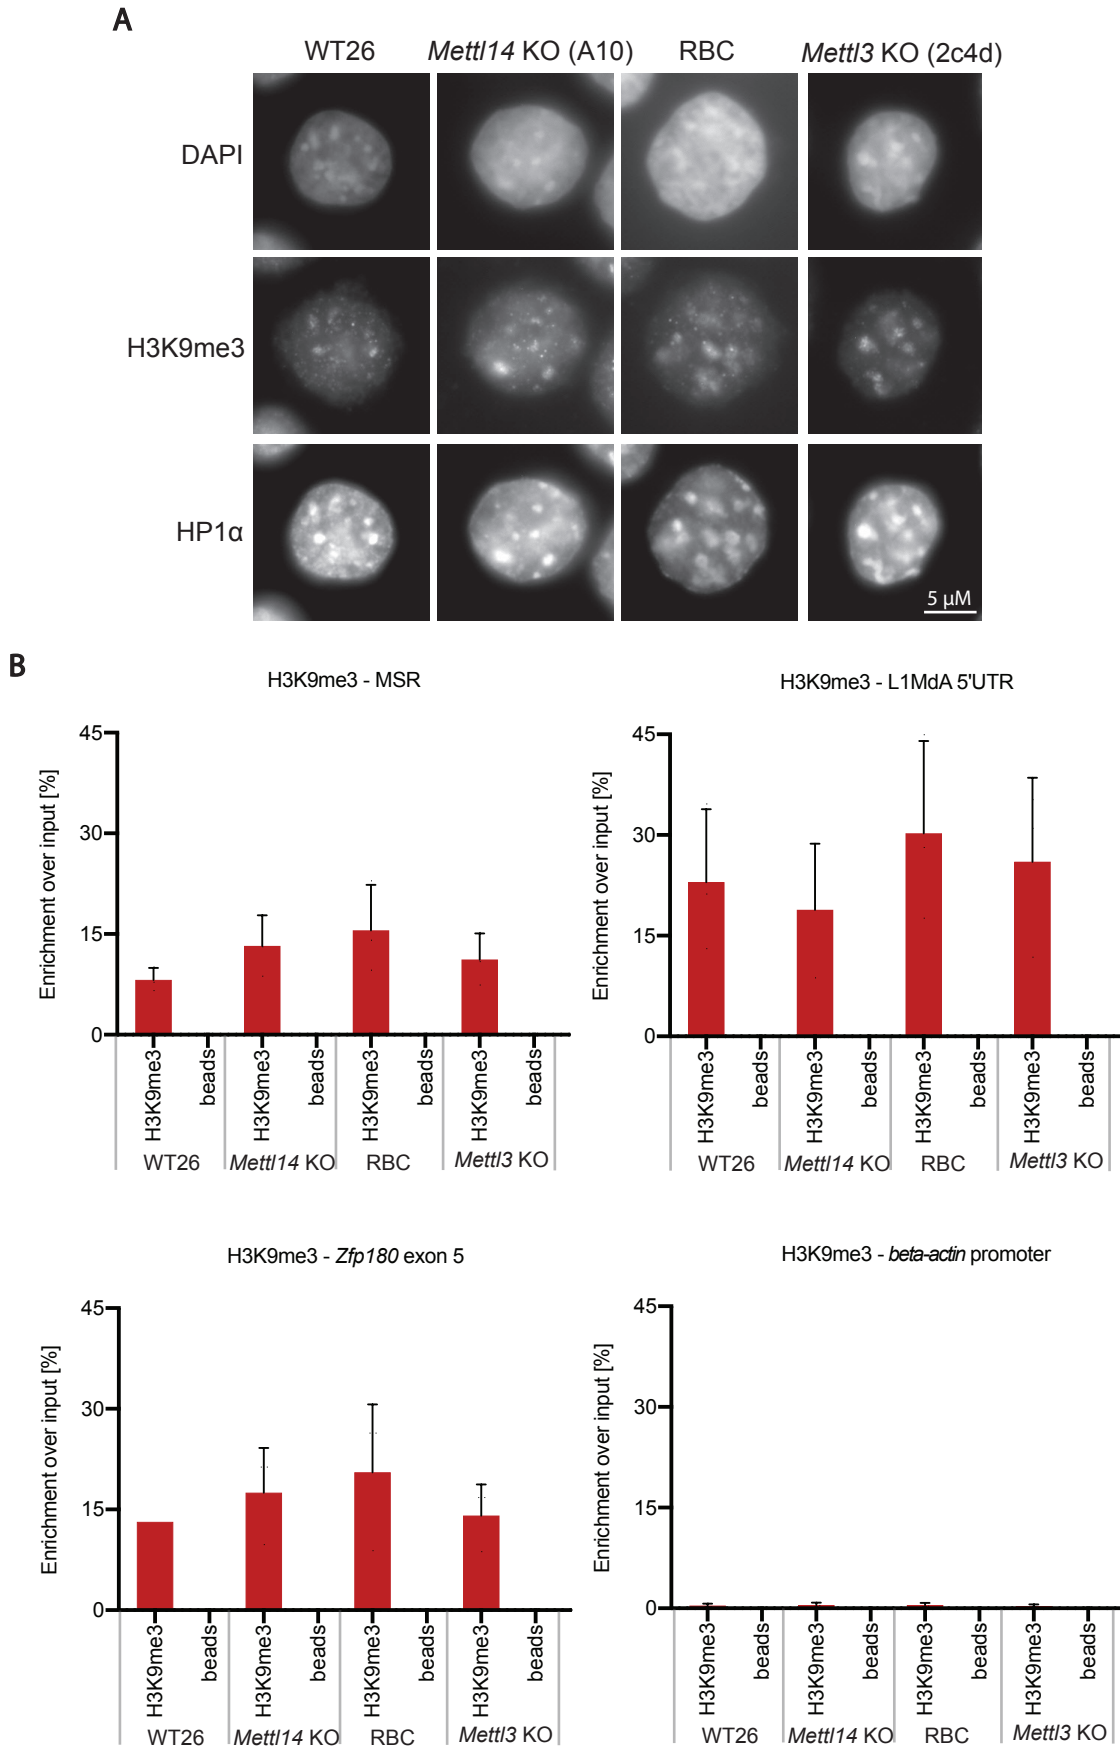

Figure S8

**A**

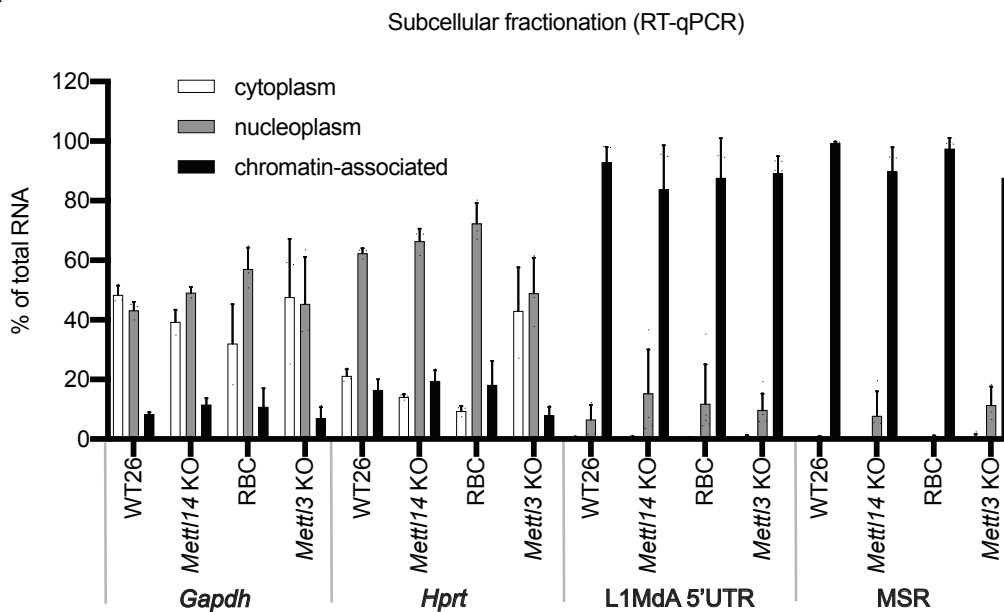

**B**

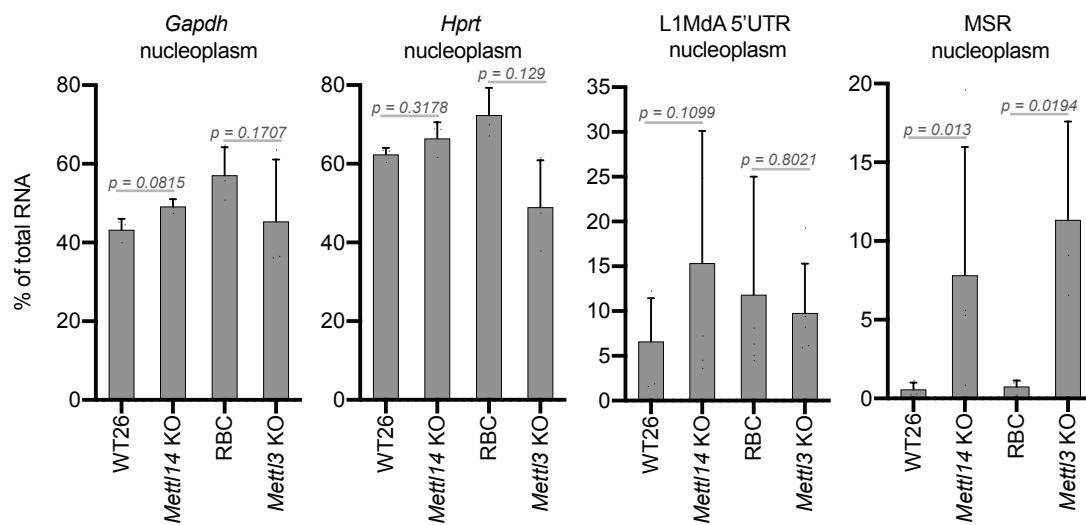

Figure S9

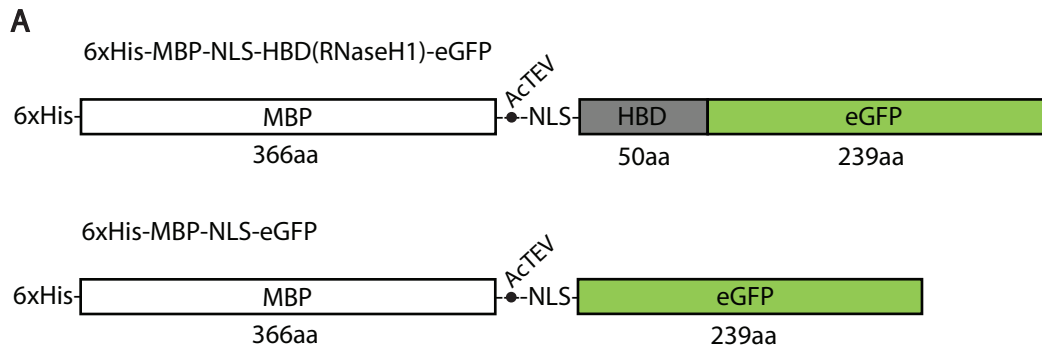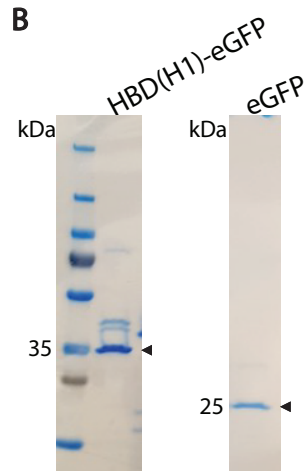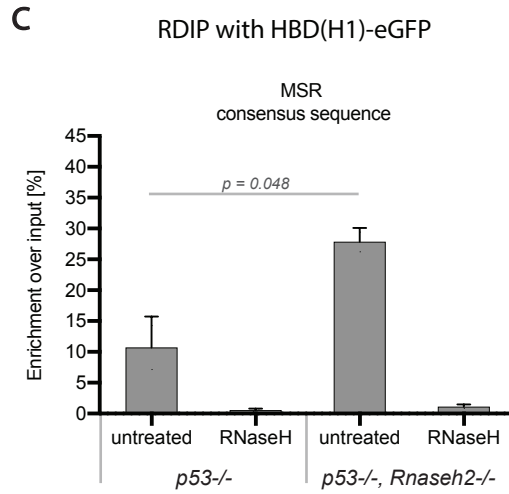

Figure S10

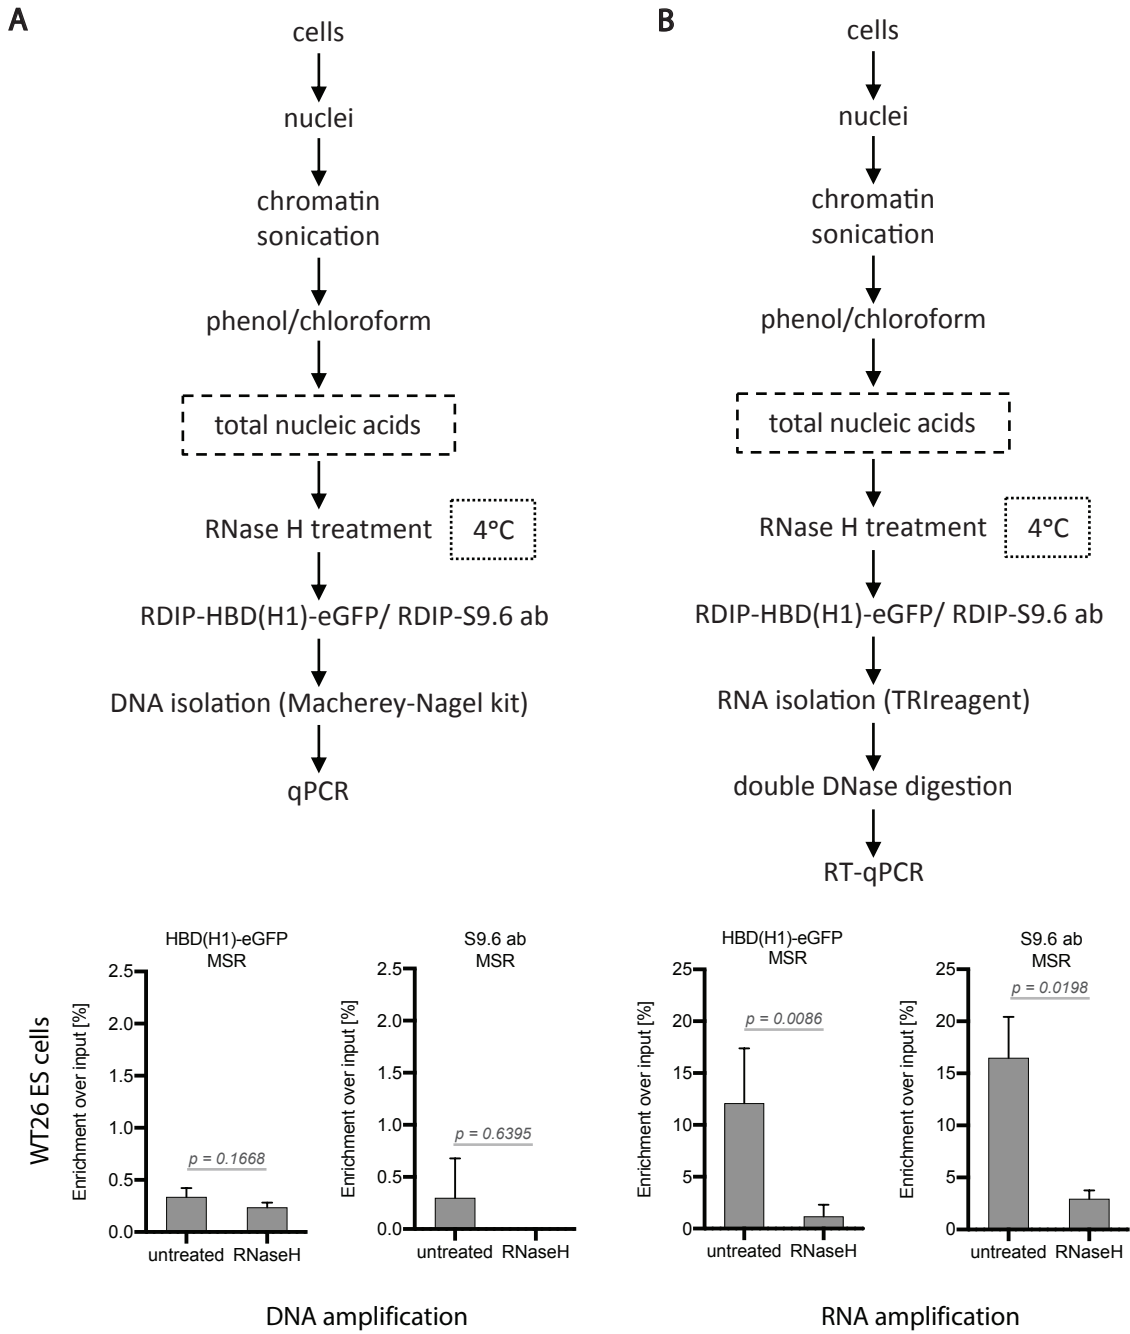

Figure S11

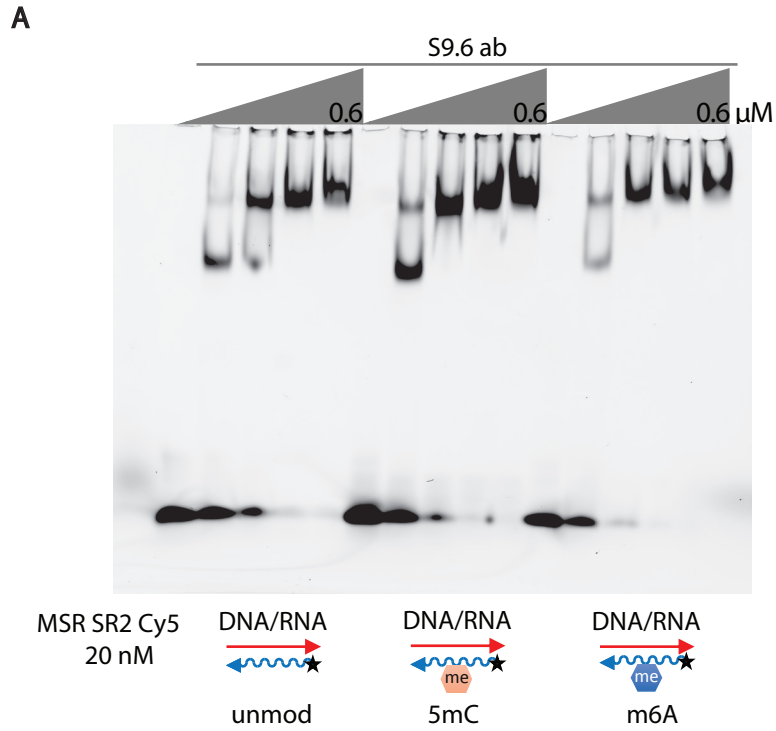

**B**

RDIP with S9.6 ab

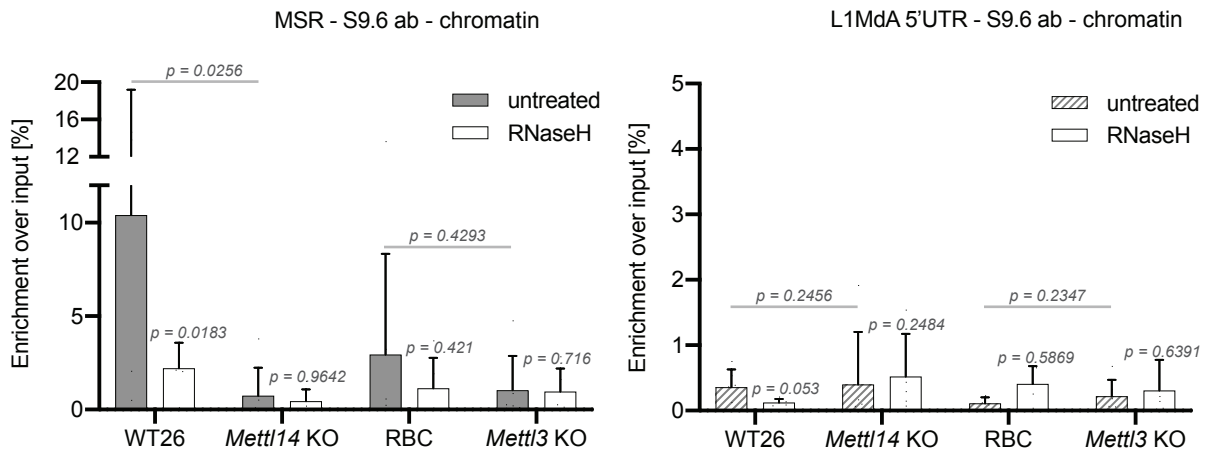

Figure S12

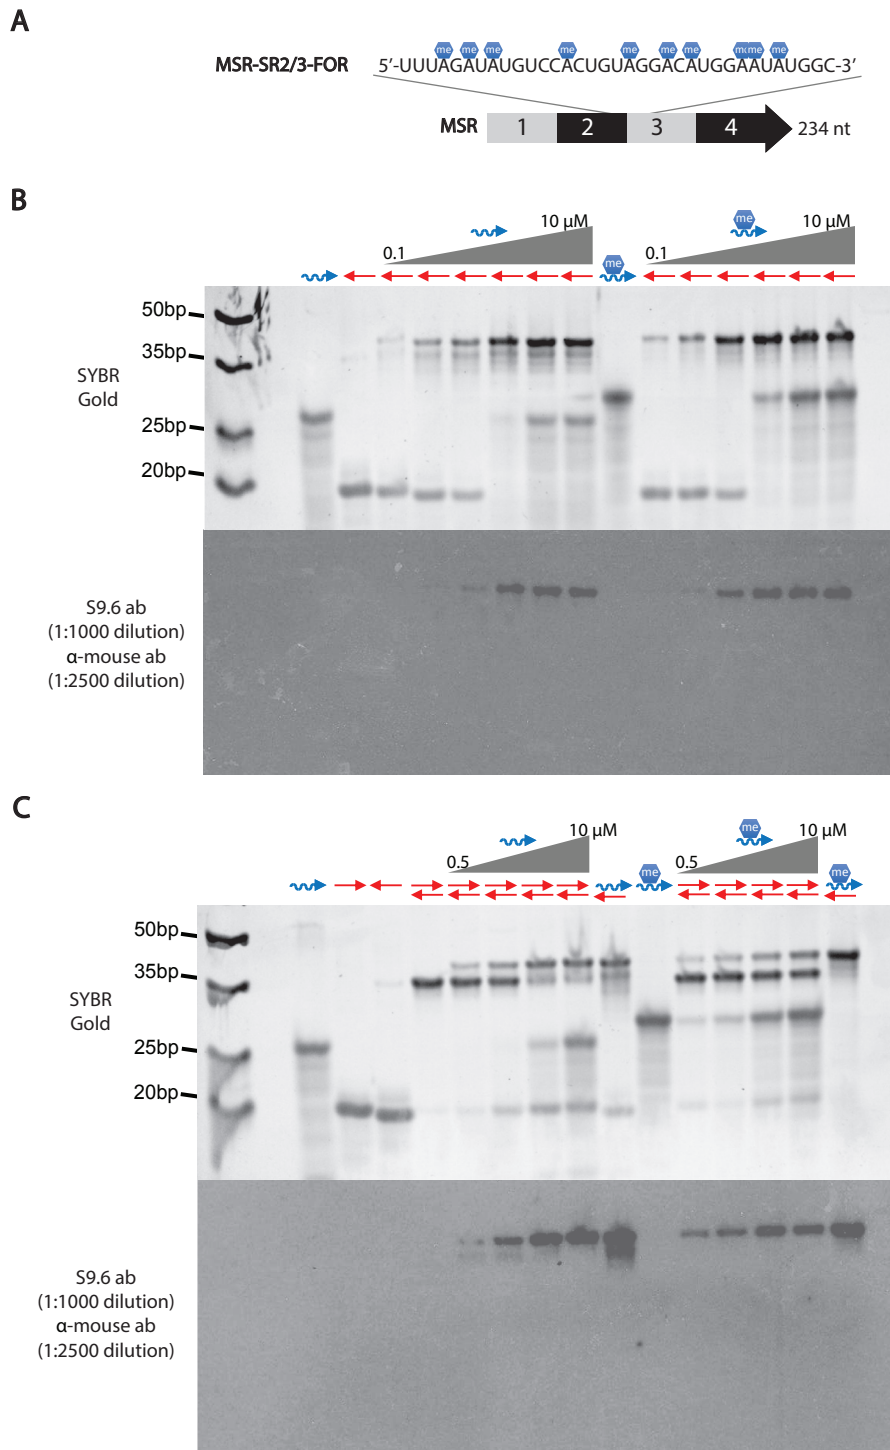

Figure S13
